# Supplementary material
Source: PubMed Central journal article supplement (PMC5398908)

Figure 1

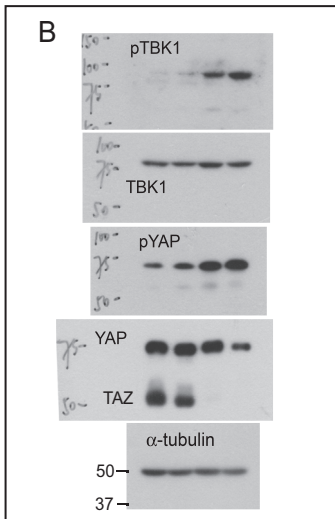

Figure 1

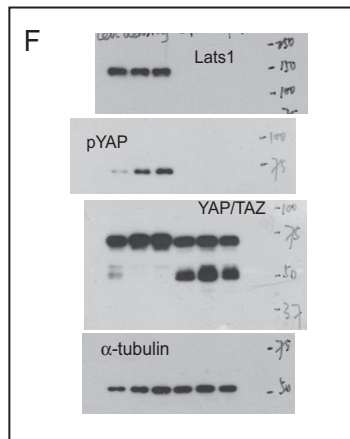

Figure 1

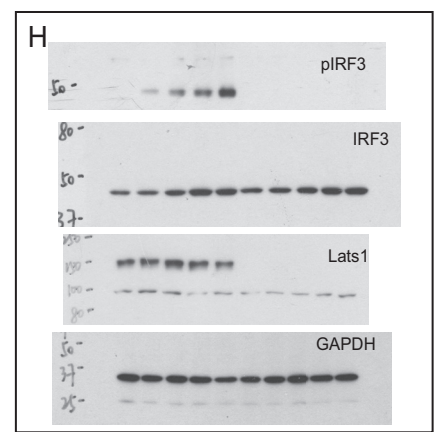

Figure 2

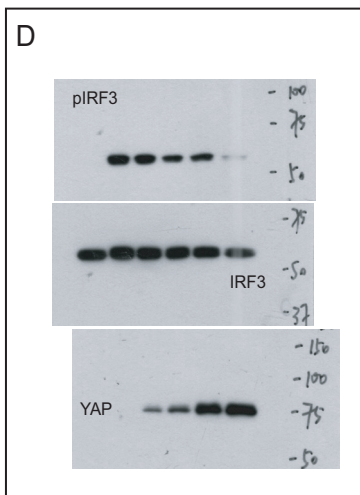

Figure 2

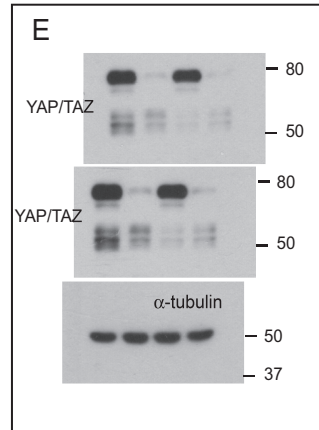

Figure 2

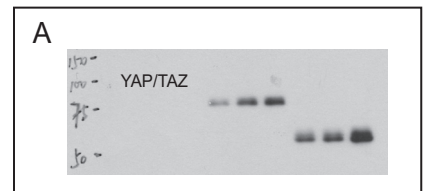

Figure 3

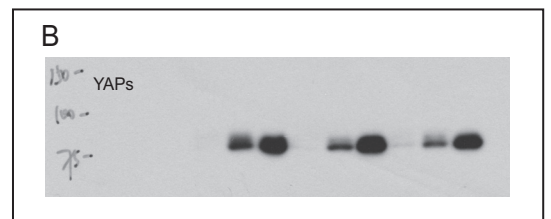

Figure 2

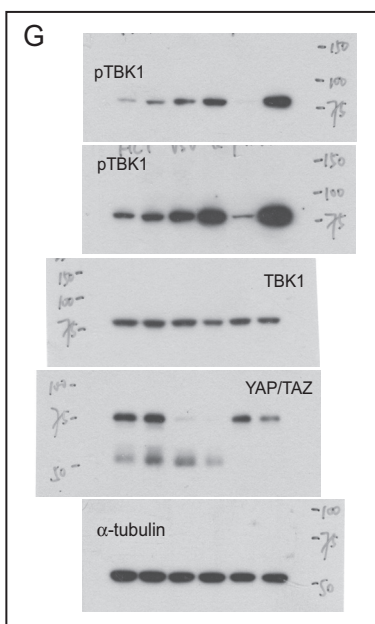

Figure 2

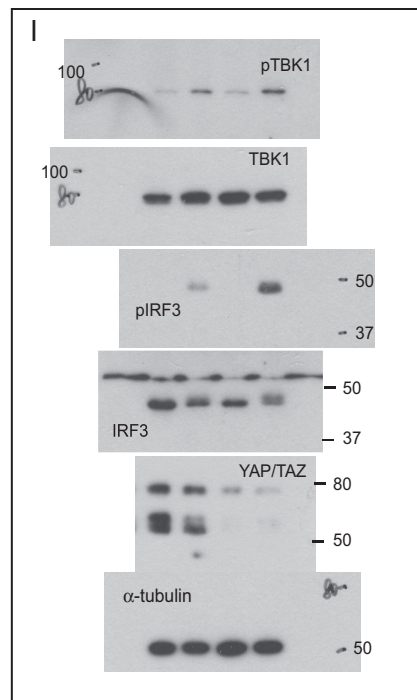

Figure 3

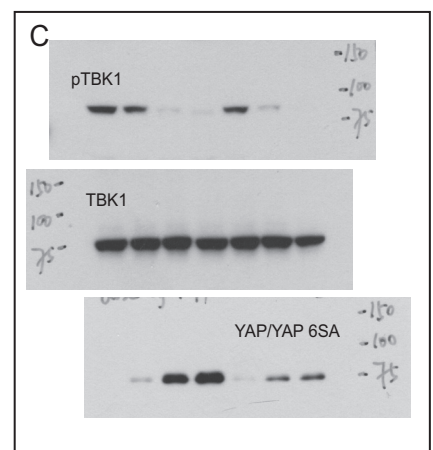

Figure 3

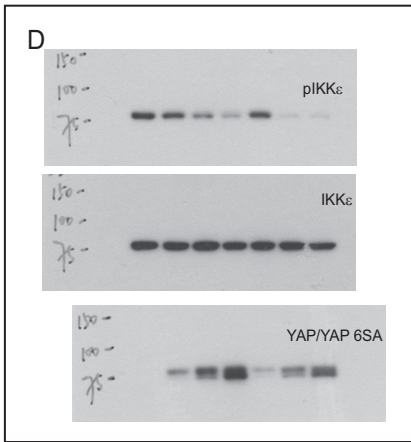

Figure 3

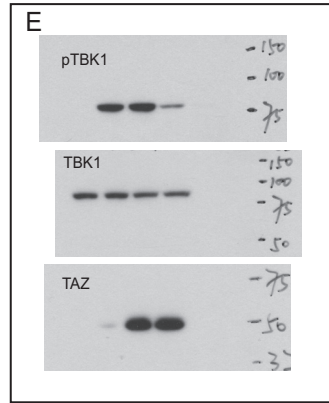

Figure 3

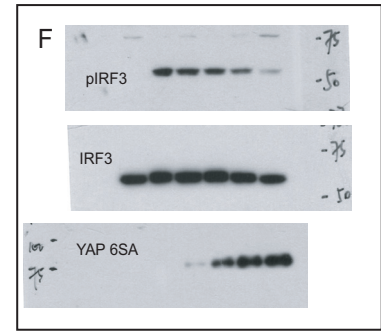

Figure 3

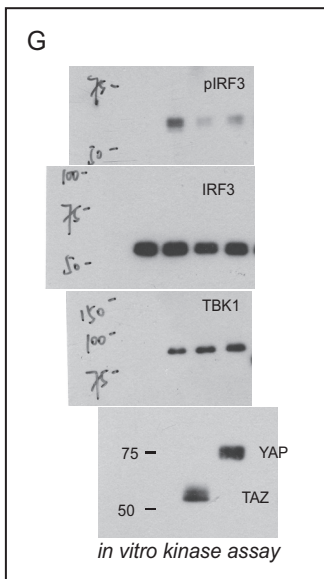

Figure 4

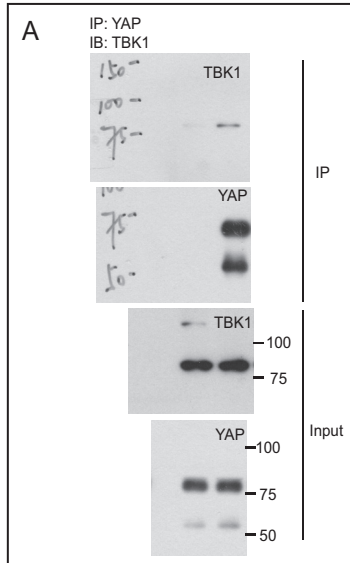

Figure 4

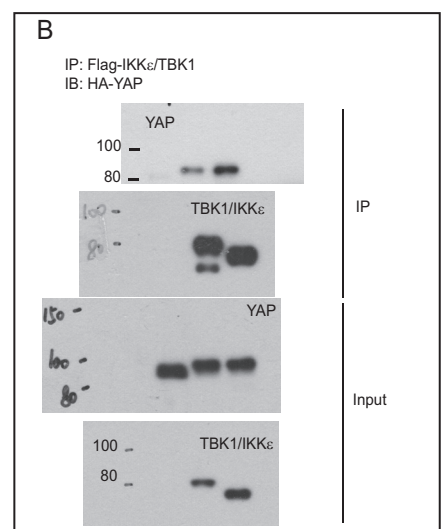

Figure 4

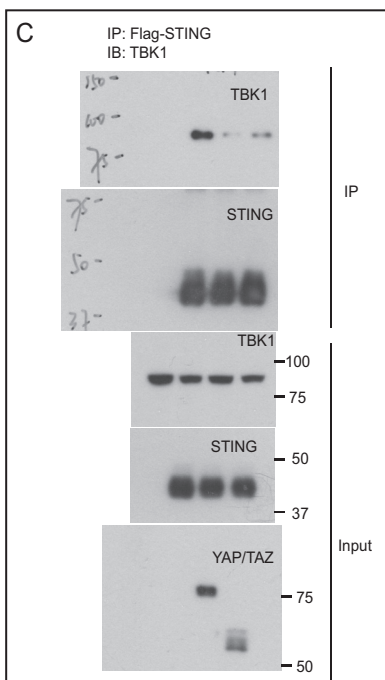

Figure 4

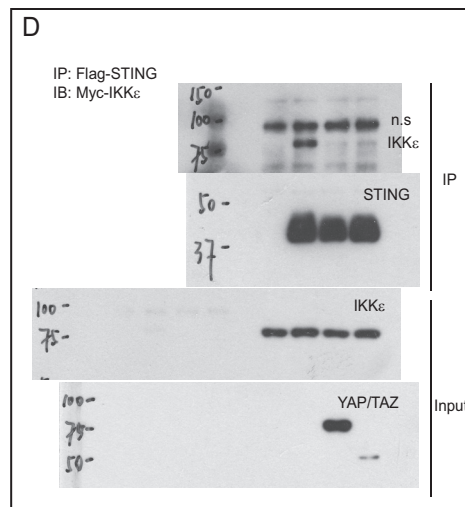

Figure 4

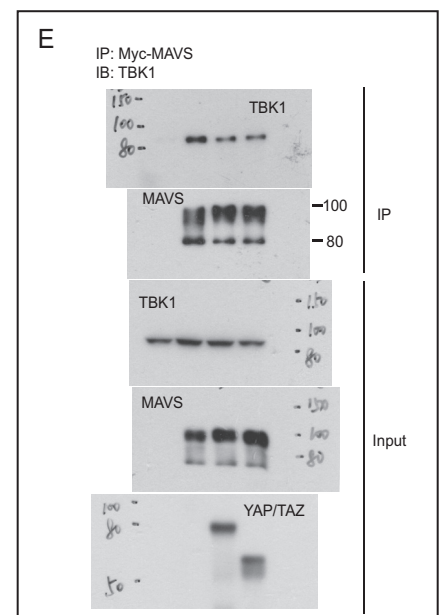

Figure 4

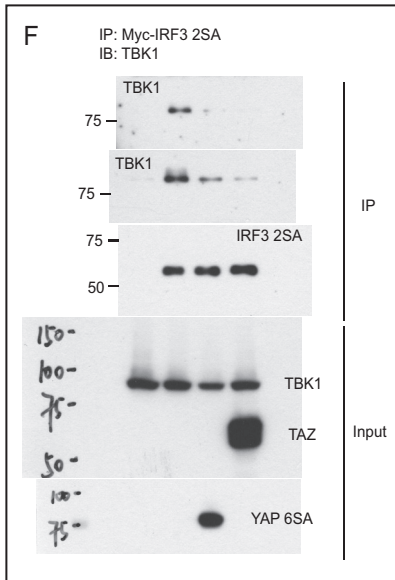

Figure 4

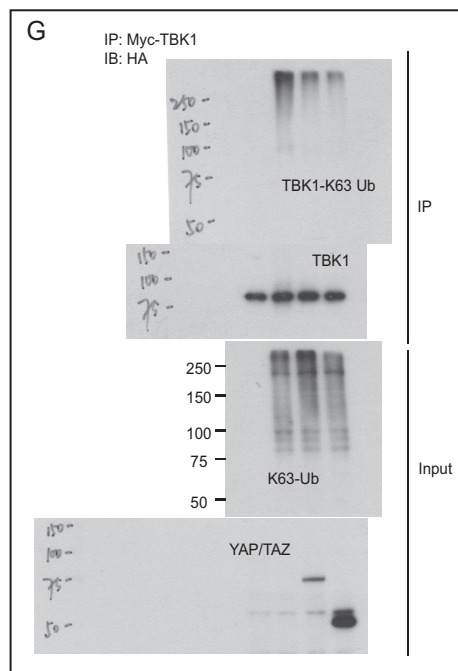

Figure 4

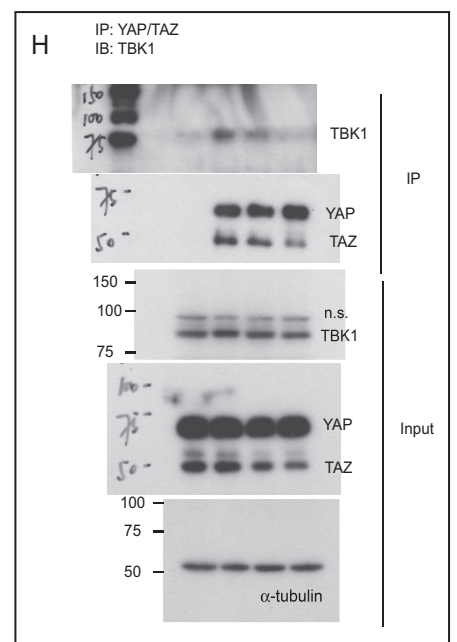

Figure 4

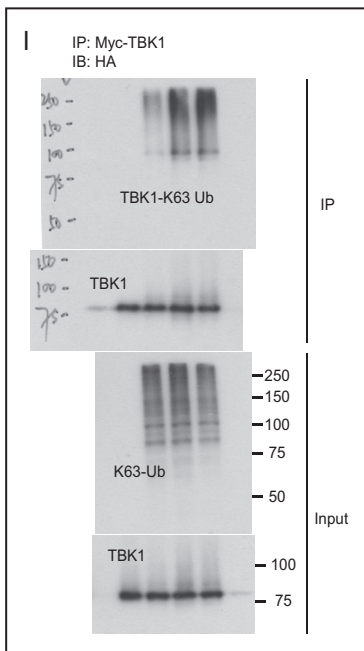

Figure 5

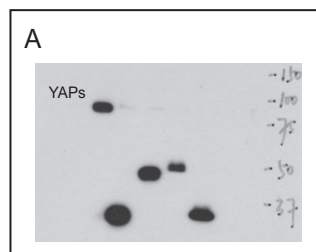

Figure 5

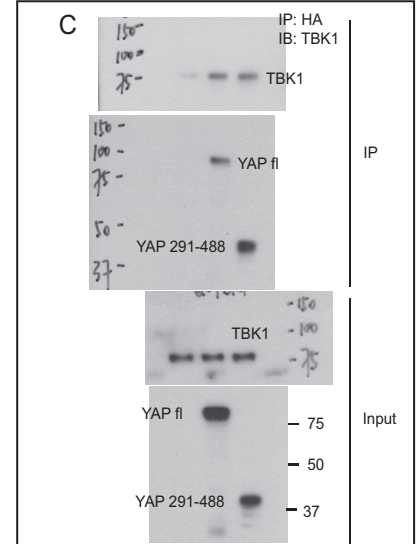

Figure 5

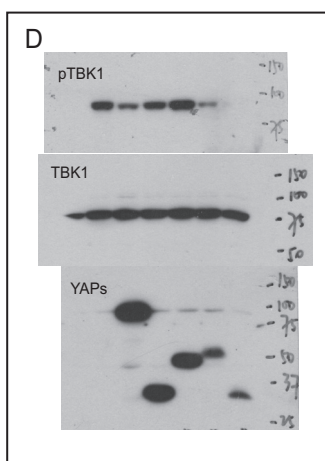

Figure 5

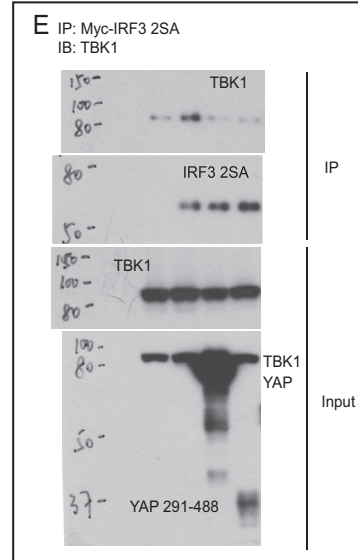

Figure 5

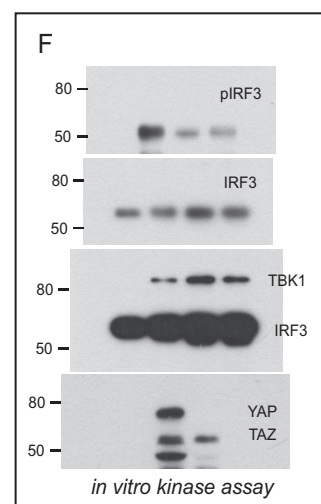

Figure 5

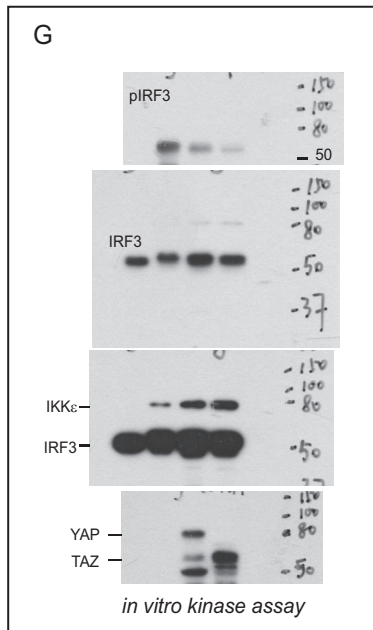

Figure 5

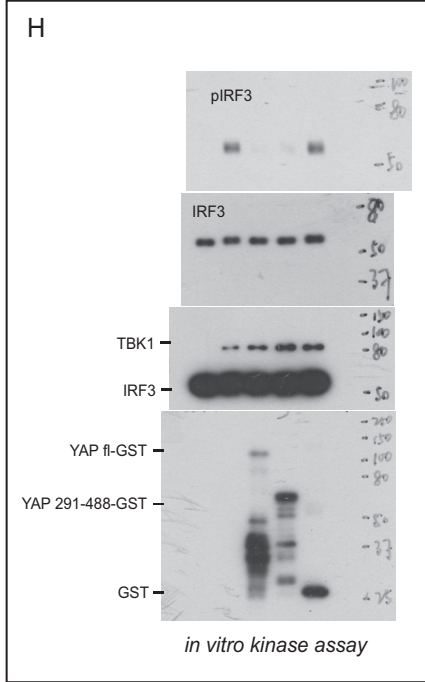

Figure 6

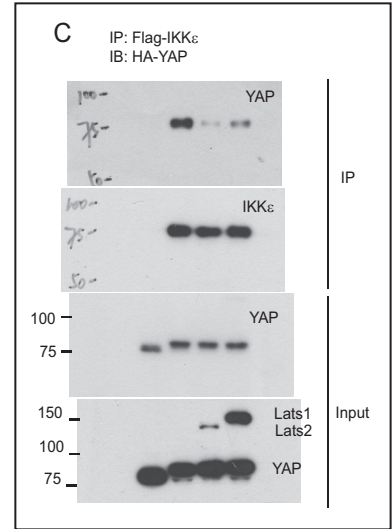

Figure 7

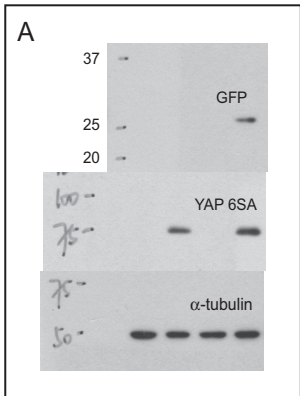

Figure 7

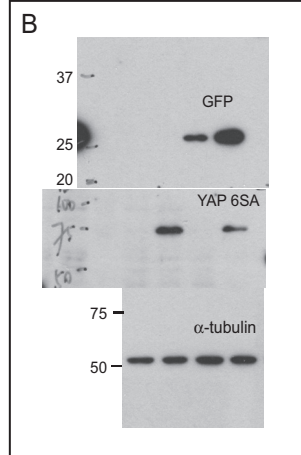

Figure 8

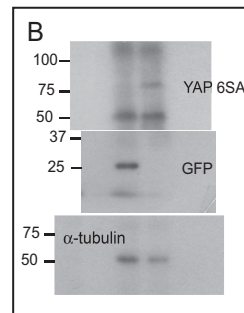

Suppl. Figure 1B

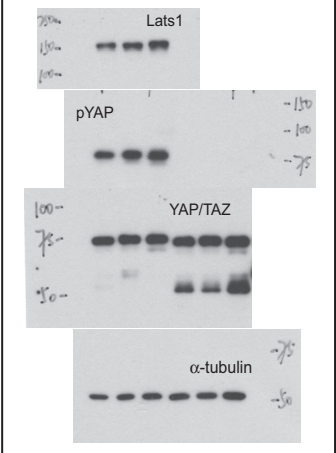

Suppl. Figure 2G

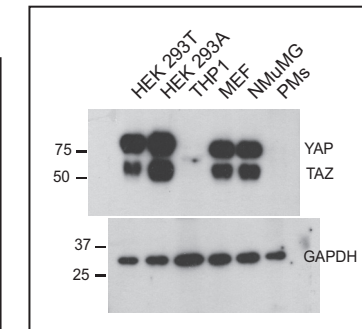

Suppl. Figure 4A

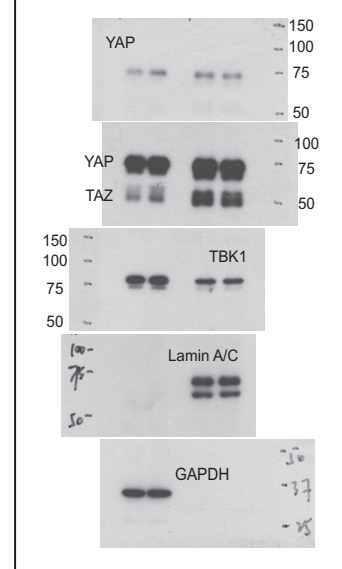

Suppl. Figure 3B

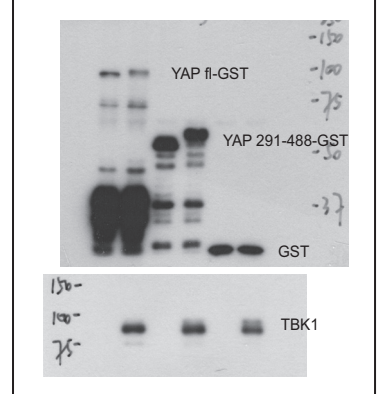

Suppl. Figure 2D

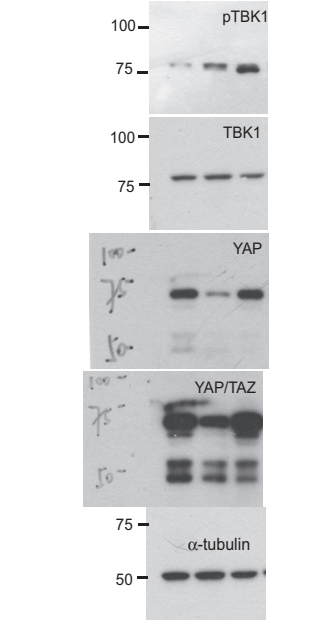

Suppl. Figure 3A

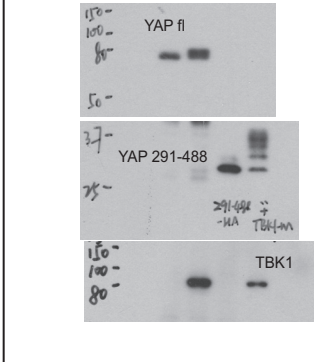

Suppl. Figure 4B

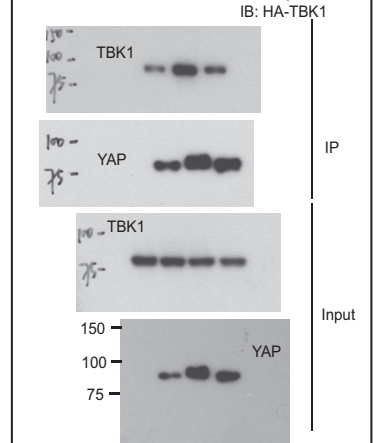

Supplement: NIHMS855045-supplement-7.pdf [file NIHMS855045-supplement-7.pdf]
